# Supplementary material
Source: Research Square preprint supplement (doi:10.21203/rs.3.rs-9375146/v1)
Supplement: Supplementary file 1 [file 8a753ca10969db7f0264b9d9.docx]

Supplementary table S1 Demographic and clinical characteristics of participants stratified by sex

| Variables | Tic disorders | | *t/U* | *P* |
| --- | --- | --- | --- | --- |
| Male（n=352） | Female (n=88) |
| **Age (years)** | 9.5 ± 1.9 | 9.5 ± 2.1 | 0.008 | 0.464 |
| **Duration (months)** | 24.0(12.0, 48.0) | 12.0 (6.0, 27) | 5.232 | **0.022** |
| **BMI (kg/m2)** | 19.3 ± 5.4 | 17.6 ± 3.9 | 8.431 | **0.004** |
| **YGTSS score** |  |  |  |  |
| YGTSS Motor score | 17.6 ± 4.1 | 16.5 ± 4.2 | 5.165 | **0.024** |
| YGTSS Vocal score | 12.0 ± 5.6 | 10.6 ± 5.4 | 4.893 | **0.027** |
| YGTSS Total score | 31.1 ± 7.0 | 28.5 ± 6.4 | 9.374 | **0.002** |
| **Hematologic parameters (10⁹/L)** |  |  |  |  |
| Platelet | 300.3 ± 61.2 | 290.6 ± 57.6 | 1.801 | 0.180 |
| Neutrophils | 3.4 ± 1.3 | 3.3 ± 1.5 | 0.776 | 0.379 |
| Lymphocyte | 2.9 ± 0.8 | 2.8 ± 0.7 | 1.388 | 0.239 |
| Monocyte | 0.4 ± 0.1 | 0.4 ± 0.1 | 4.744 | **0.030** |
| PIV(log10) | 2.1 ± 0.3 | 2.1 ± 0.3 | 3.343 | 0.068 |
